# Supplementary material
Source: PubMed Central journal article supplement (PMC9301866)
Supplement: 12877_2022_3239_MOESM2_ESM.pdf [file 12877_2022_3239_MOESM2_ESM.pdf]

Appendix 4. Calendar sheet

PrAISED2 Study Calendar - please complete every day

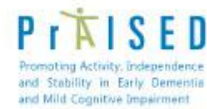

**August 2020**

Participant ID: \_\_\_\_\_ Patient Participant Initials: \_\_\_\_\_

| Day            | Falls           |                                   | PrAISED Exercises |                 |
|----------------|-----------------|-----------------------------------|-------------------|-----------------|
|                | Number of falls | If you had a fall, what happened? | Yes / No          | Time in minutes |
| <i>example</i> | 0               | <i>n/a</i>                        | No                | <i>n/a</i>      |
| 1, Sunday      |                 |                                   |                   |                 |
| 2, Monday      |                 |                                   |                   |                 |
| 3, Tuesday     |                 |                                   |                   |                 |
| 4, Wednesday   |                 |                                   |                   |                 |
| 5, Thursday    |                 |                                   |                   |                 |
| 6, Friday      |                 |                                   |                   |                 |
| 7, Saturday    |                 |                                   |                   |                 |
| 8, Sunday      |                 |                                   |                   |                 |
| 9, Monday      |                 |                                   |                   |                 |
| 10, Tuesday    |                 |                                   |                   |                 |
| 11, Wednesday  |                 |                                   |                   |                 |
| 12, Thursday   |                 |                                   |                   |                 |
| 13, Friday     |                 |                                   |                   |                 |
| 14, Saturday   |                 |                                   |                   |                 |
| 15, Sunday     |                 |                                   |                   |                 |
| 16, Monday     |                 |                                   |                   |                 |
| 17, Tuesday    |                 |                                   |                   |                 |
| 18, Wednesday  |                 |                                   |                   |                 |
| 19, Thursday   |                 |                                   |                   |                 |
| 20, Friday     |                 |                                   |                   |                 |
| 21, Saturday   |                 |                                   |                   |                 |
| 22, Sunday     |                 |                                   |                   |                 |
| 23, Monday     |                 |                                   |                   |                 |
| 24, Tuesday    |                 |                                   |                   |                 |
| 25, Wednesday  |                 |                                   |                   |                 |
| 26, Thursday   |                 |                                   |                   |                 |
| 27, Friday     |                 |                                   |                   |                 |
| 28, Saturday   |                 |                                   |                   |                 |
| 29, Sunday     |                 |                                   |                   |                 |
| 30, Monday     |                 |                                   |                   |                 |
| 31, Tuesday    |                 |                                   |                   |                 |

**Monthly Service Use Questionnaire:**

Please complete the short questionnaire below at the end of the month.

In the last month, have you had any A&E / Emergency Department attendances?

Yes  No

If yes, how many?

If yes, please tell us what happened in Box 1.

In the last month, have you had any paid help (e.g. home carer, cleaner, sitting service)?

Yes  No

If yes, how many hours?

In the last month, have you had any unpaid help (informal care from family and friends)?

Yes  No

If yes, how many hours?

In the last month, have you had any nights in a care home / respite care?

Yes  No

If yes, how many nights?

In the last month, have you had contact with a nurse of any kind?

Yes  No

If yes, how many contacts?

In the last month, have you had contact with a GP?

Yes  No

If yes, how many contacts?

If yes, please tell us what happened in Box 1.

| Box 1. Injuries or symptoms during or following your exercises or activities |                |      |                |
|------------------------------------------------------------------------------|----------------|------|----------------|
| Date                                                                         | What happened? | Date | What happened? |
|                                                                              |                |      |                |
|                                                                              |                |      |                |
|                                                                              |                |      |                |
|                                                                              |                |      |                |

If you need more space, please use the back of this sheet

**Please detach and return in the pre-paid envelope provided**
