# Supplementary material
Source: PubMed Central journal article supplement (PMC9301866)
Supplement: 12877_2022_3239_MOESM3_ESM.pdf [file 12877_2022_3239_MOESM3_ESM.pdf]

## Appendix 5. Instruction for participants

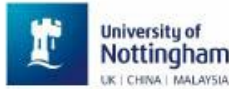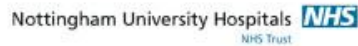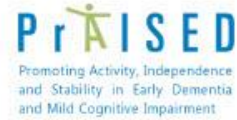

### Calendar Guide

#### **Falls**

- Tell us if you have had a fall, by writing the number of falls each day
- If you had a fall, briefly describe what happened.
- If you did not have a fall, please write '0'. Please do not leave it blank.

#### **PrAISED Exercises**

If you have been allocated to Therapy Package 2, please complete this column:

- Tell us if you have done any of your PrAISED exercises, by writing Yes or No for each day.
- If you have done your exercises, please tell us how many minutes you did these for on that day.
- You can include the time you have done the exercises when the therapist visits you.

#### **Monthly Service Use Questionnaire**

Answer these questions when you reach the end of the month for each calendar page (i.e. each month).

- Tick yes or no for each question.
- If yes, tell us the number of times / hours (as appropriate) you have used the service. You can use the back of the page to write notes or further explanations if you wish.
- If you have had any A&E / Emergency Department attendances in the last month, please tell us what happened in the 'Injuries or Symptoms' box (Box 1).

#### **Injuries or Symptoms**

If you hurt yourself or experience any unpleasant symptoms due to any exercises or activities:

- Tell us what date this happened
- Describe what happened. For example: 'felt dizzy whilst doing sitting to standing exercises'.

#### **Once you have reached the end of the month:**

- Tear off the calendar page and post it to us in a prepaid envelope provided.  
Your envelopes will be sent out one at a time towards the end of the month.

If you have any questions about the calendars, please contact:
